# Supplementary material
Source: MDPI journal article supplement (https://www.mdpi.com/2218-2004/10/1/27)
Supplement: s1 [file s1]

# Persistent Planar Tetracoordinate Carbon in Global Minima Structures of Silicon Rich Silicon-Carbon Clusters

Luis Leyva-Parra <sup>1,2</sup>, Diego Inostroza <sup>1,2</sup>, Osvaldo Yañez<sup>3,4</sup>, Julio César Cruz <sup>5</sup>, Jorge Garza <sup>5</sup>, Víctor García <sup>6,\*</sup> and William Tiznado <sup>1,\*</sup>

<sup>1</sup> Computational and Theoretical Chemistry Group, Departamento de Ciencias Química, Facultad de Ciencias Exactas, Universidad Andres Bello, República 498, Santiago, Chile; [wtiznado@unab.cl](mailto:wtiznado@unab.cl) ; [l.leyvaparra@uandresbello.edu](mailto:l.leyvaparra@uandresbello.edu) ; [dinostro92@gmail.com](mailto:dinostro92@gmail.com)

<sup>2</sup> Universidad Andres Bello, Programa de Doctorado en Fisicoquímica Molecular, Facultad de Ciencias Exactas, Santiago, Chile; [l.leyvaparra@uandresbello.edu](mailto:l.leyvaparra@uandresbello.edu) ; [dinostro92@gmail.com](mailto:dinostro92@gmail.com)

<sup>3</sup> Center of New Drugs for Hypertension (CENDHY), Santiago, Chile; [osvyanezosses@gmail.com](mailto:osvyanezosses@gmail.com)

<sup>4</sup> Department of Pharmaceutical Science and Technology, School of Chemical and Pharmaceutical Sciences, Universidad de Chile, Santiago, Chile; [osvyanezosses@gmail.com](mailto:osvyanezosses@gmail.com)

<sup>5</sup> Departamento de Química, División de Ciencias Básicas e Ingeniería, Universidad Autónoma Metropolitana-Iztapalapa, San Rafael Atlixco 186, Col. Vicentina, Iztapalapa. C. P. 09340, Ciudad de México, Mexico ; [julio.cruz088@gmail.com](mailto:julio.cruz088@gmail.com) ; [jgo@xanum.uam.mx](mailto:jgo@xanum.uam.mx)

<sup>6</sup> Facultad de Química e Ingeniería Química, Universidad Nacional Mayor de San Marcos, Lima 15004, Perú; [victor.garcia@unmsm.edu.pe](mailto:victor.garcia@unmsm.edu.pe)

\* Correspondence: [wtiznado@unab.cl](mailto:wtiznado@unab.cl) ; Tel.: (optional; include country code; if there are multiple corresponding authors, add author initials)

## SUPPORTING INFORMATION

**Figures S1-S3.** Global minimum and low-lying isomers of  $\text{Si}_n\text{C}_n$  ( $n = 5, 8$  and  $9$ ), their point group symmetries and spectroscopic states. Relative energies are shown in  $\text{kcal.mol}^{-1}$  at PBE0/def2-TZVP and PBE0-D3/def2-TZVP (in parentheses) levels including zero-point energy (ZPE) corrections. A number-letter label identifies structure to facilitate their connection with their Cartesian coordinate (at the end of the ESI).

$\text{Si}_5\text{C}_5$

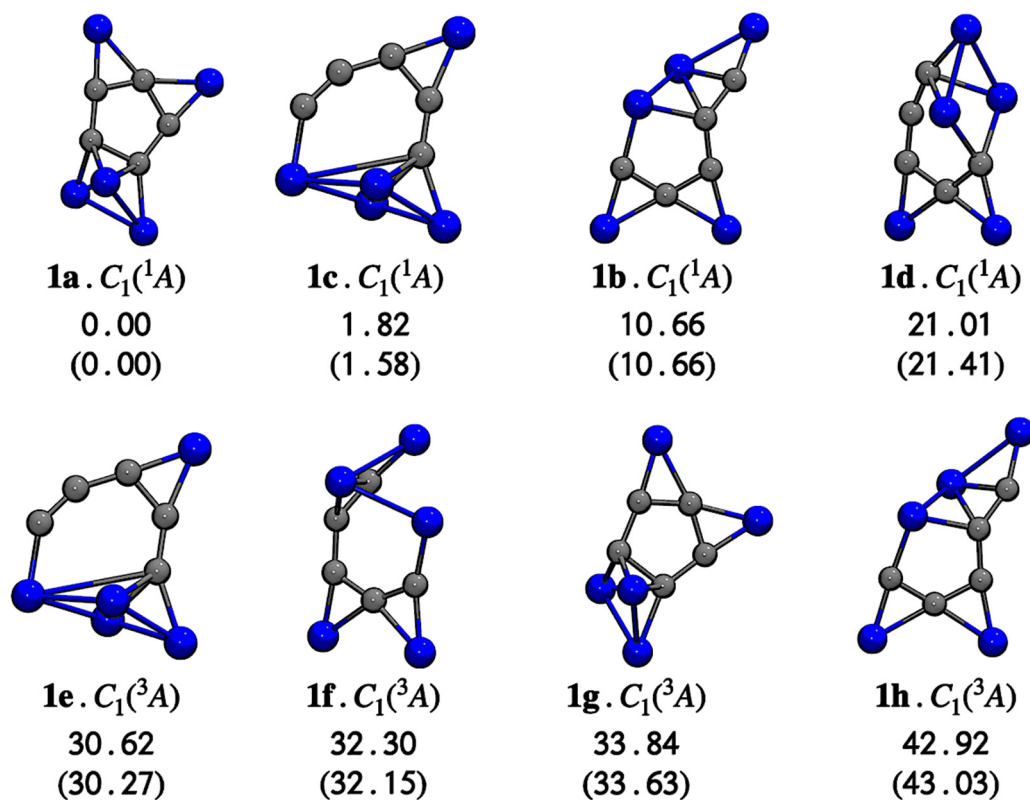

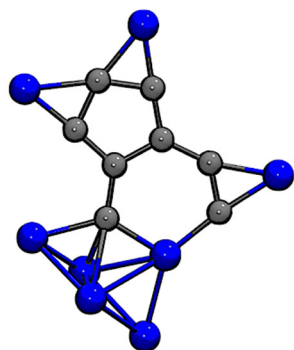

**2a** . C<sub>1</sub>(<sup>1</sup>A)

0.00  
(0.00)

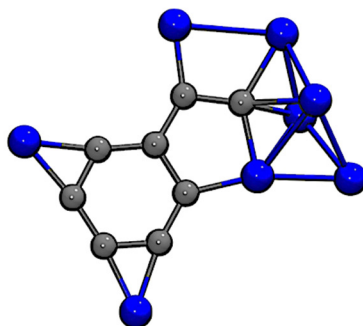

**2b** . C<sub>1</sub>(<sup>1</sup>A)

2.48  
(2.56)

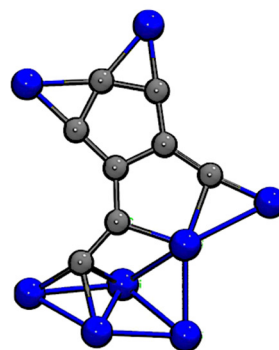

**2c** . C<sub>1</sub>(<sup>1</sup>A)

13.92  
(13.97)

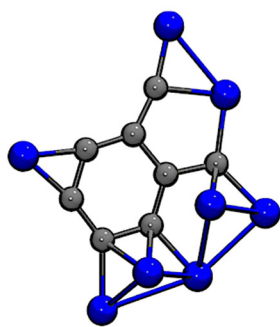

**2d** . C<sub>1</sub>(<sup>1</sup>A)

18.60  
(18.19)

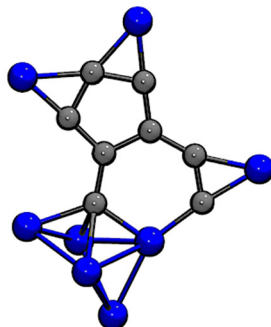

**2e** . C<sub>1</sub>(<sup>3</sup>A)

22.43  
(22.34)

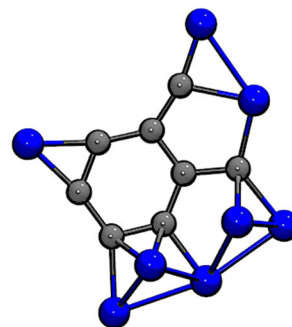

**2f** . C<sub>1</sub>(<sup>3</sup>A)

25.96  
(25.55)

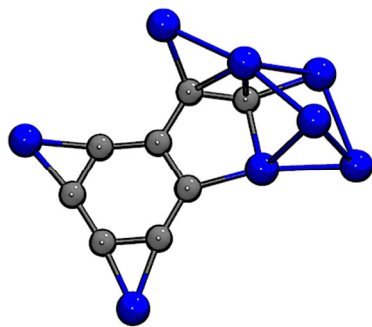

**2g** . C<sub>1</sub>(<sup>3</sup>A)

32.70  
(32.71)

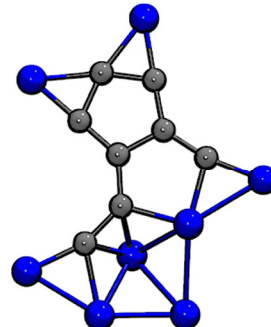

**2h** . C<sub>1</sub>(<sup>3</sup>A)

49.73  
(49.74)

Si<sub>9</sub>C<sub>9</sub>

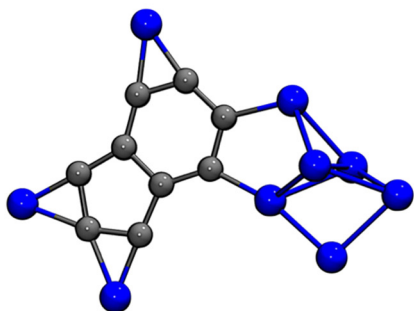

**3a**.  $C_1(^1A)$   
0.00  
(0.00)

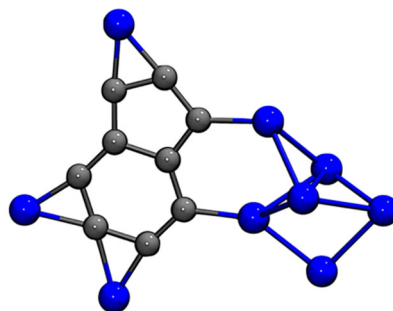

**3b**.  $C_1(^1A)$   
12.87  
(12.48)

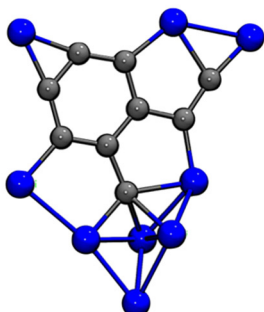

**3c**.  $C_1(^1A)$   
18.26  
(17.14)

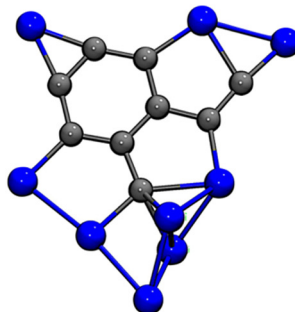

**3d**.  $C_1(^3A)$   
18.92  
(17.73)

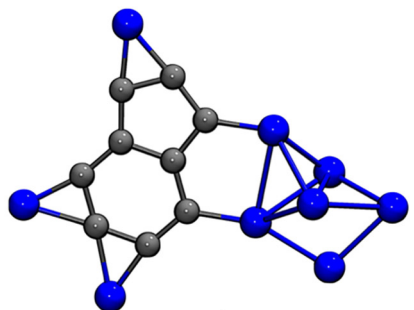

**3e**.  $C_1(^3A)$   
21.63  
(21.44)

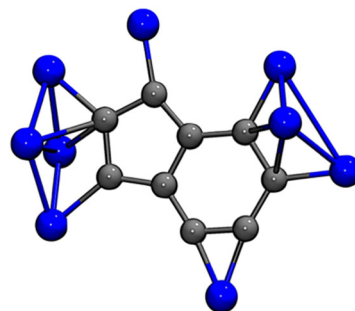

**3f**.  $C_1(^1A)$   
41.23  
(39.84)

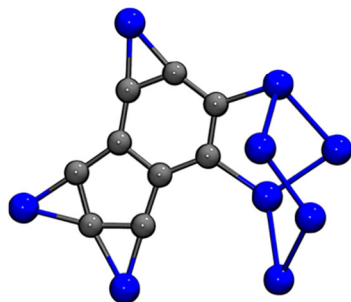

**3g**.  $C_1(^3A)$   
43.94  
(42.43)

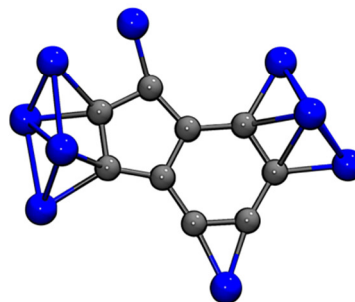

**3h**.  $C_1(^3A)$   
67.03  
(65.66)

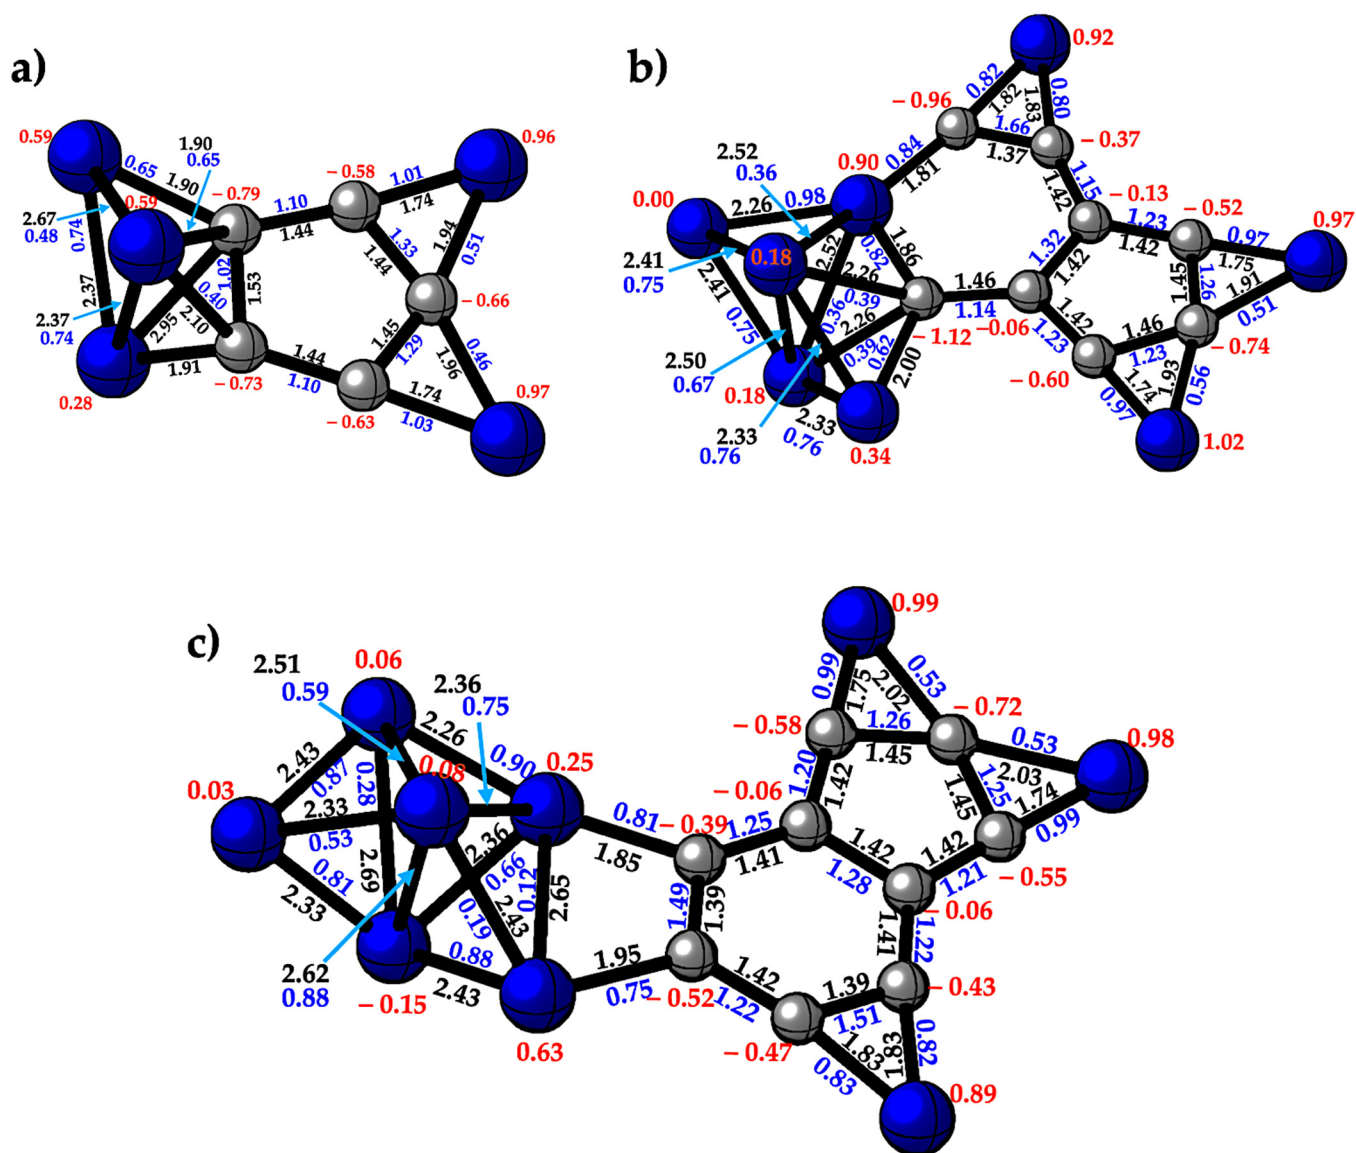

**Figure S4.** Bond length in Å (**black**), natural charges (**red**) and Wiberg bond indices (**blue**) for the a)  $\text{Si}_5\text{C}_5$ , b)  $\text{Si}_8\text{C}_8$  and c)  $\text{Si}_9\text{C}_9$  global minimum at the PBE0/def2-TZVP level.

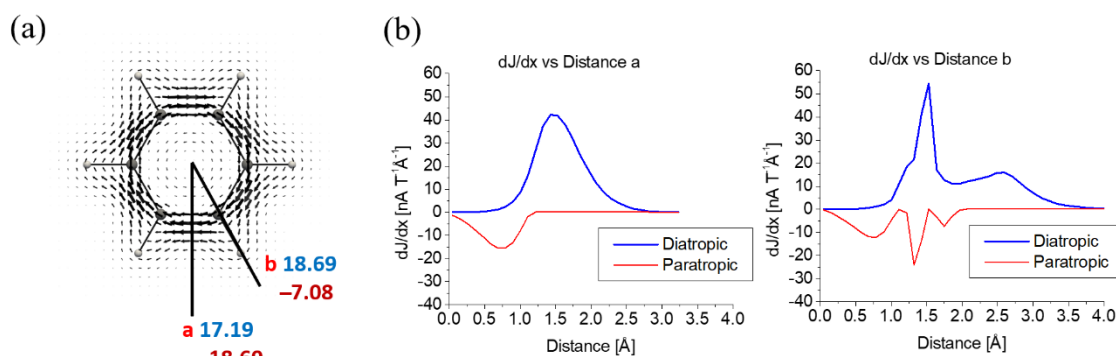

**Figure S5.** (a) Vector plot visualization of the current density of  $C_6H_6$  in a plane placed  $0.5 \text{ \AA}$  above the molecular plane and top view of integration planes. The intensities of the diatropic currents are indicated in blue while the intensity of the paratropic currents in red. The intensity of the total current susceptibility is the sum of the paratropic and diatropic contribution. (b) Integration profiles along the integration planes of  $C_6H_6$ .

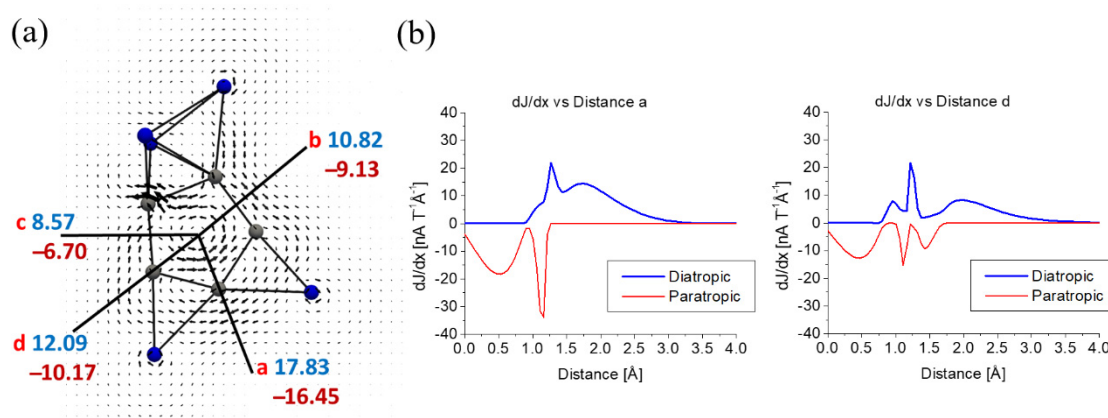

**Figure S6.** (a) Vector plot visualization of the current density of  $Si_5C_5$  in a plane placed  $0.5 \text{ \AA}$  above the molecular plane and top view of integration planes. The intensities of the diatropic currents are indicated in blue while the intensity of the paratropic currents in red. The intensity of the total current susceptibility is the sum of the paratropic and diatropic contribution. (b) Integration profiles along the integration planes of  $Si_5C_5$ .



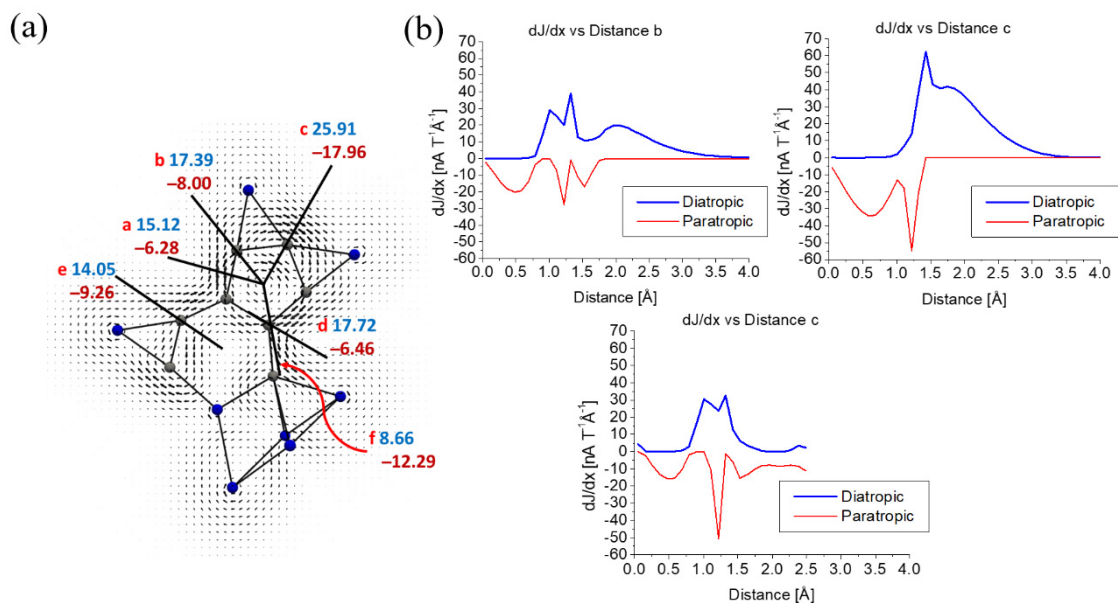

**Figure S7.** (a) Vector plot visualization of the current density of  $\text{Si}_8\text{C}_8$  in a plane placed  $0.5 \text{ \AA}$  above the molecular plane and top view of integration planes. The intensities of the diatropic currents are indicated in blue while the intensity of the paratropic currents in red. The intensity of the total current susceptibility is the sum of the paratropic and diatropic contribution. (b) Integration profiles along the integration planes of  $\text{Si}_8\text{C}_8$ .

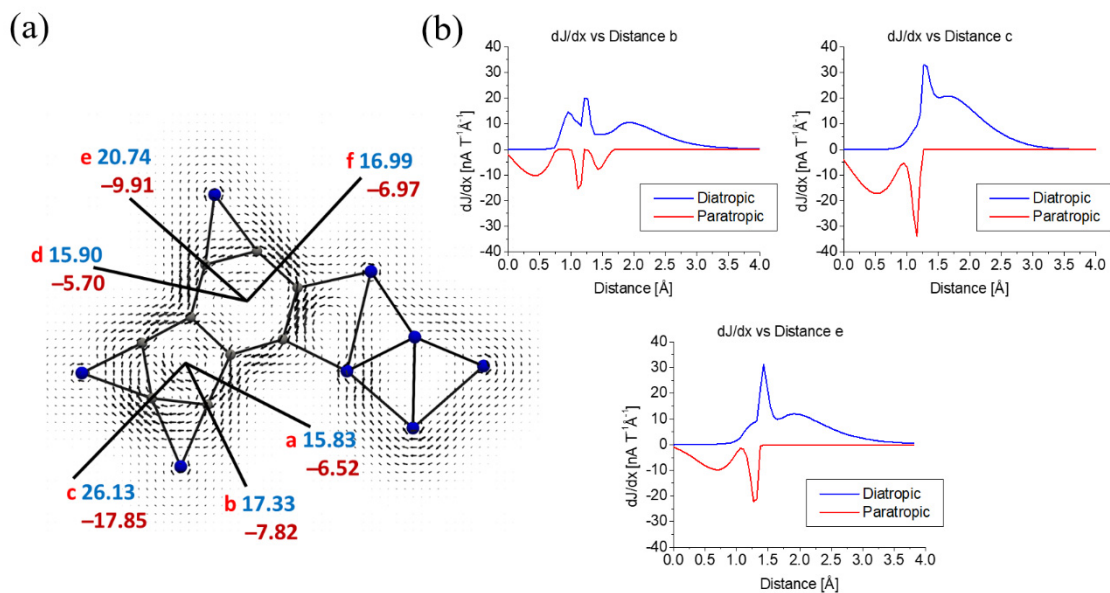

**Figure S8.** (a) Vector plot visualization of the current density of  $\text{Si}_9\text{C}_9$  in a plane placed  $0.5 \text{ \AA}$  above the molecular plane and top view of integration planes. The intensities of the diatropic currents are indicated in blue while the intensity of the paratropic currents in red. The intensity of the total current susceptibility is the sum of the paratropic and diatropic contribution. (b) Integration profiles along the integration planes of  $\text{Si}_9\text{C}_9$ .

**Table S1.** Cartesian coordinates of the Si<sub>n</sub>C<sub>n</sub> (n = 5, 8 and 9) systems and the lowest harmonic vibrational frequencies in parentheses (in cm<sup>-1</sup>) calculated at the PBE0/def2-TZVP level of theory.

| 1a (88.6) |           |           |           | 1b (82.6) |              |              |              |
|-----------|-----------|-----------|-----------|-----------|--------------|--------------|--------------|
| 6         | 0.448483  | -1.624707 | 0.000000  | 6         | -0.849026    | 2.546393     | -0.000959    |
| 6         | -0.941430 | -1.261804 | 0.000000  | 6         | -1.700212    | 1.634041     | 0.000955     |
| 6         | -1.045056 | 0.177559  | 0.000000  | 6         | -2.225489    | 0.367619     | 0.000608     |
| 6         | 1.235842  | -0.408725 | 0.000000  | 6         | -1.250441    | -0.632901    | -0.000030    |
| 6         | 0.374596  | 0.750770  | 0.000000  | 6         | 0.173791     | -0.464346    | -0.000189    |
| 14        | 2.408441  | -1.692128 | 0.000000  | 14        | -2.950576    | -1.298457    | -0.000452    |
| 14        | -0.910536 | -3.003978 | 0.000000  | 14        | 1.624615     | 0.047131     | -1.416657    |
| 14        | -1.045056 | 1.528551  | 1.332836  | 14        | 1.562764     | -1.795127    | 0.000372     |
| 14        | 0.561162  | 2.653393  | 0.000000  | 14        | 0.647027     | 1.519821     | -0.000370    |
| 14        | -1.045056 | 1.528551  | -1.332836 | 14        | 1.623903     | 0.047714     | 1.416942     |
| 1c (68.2) |           |           |           | 1d (82.1) |              |              |              |
| 6         | -1.583087 | -1.017064 | -0.091059 | 6         | -1.607764000 | -1.021827000 | -0.323335000 |
| 6         | -1.669582 | 0.414778  | -0.030473 | 6         | -0.391807000 | -1.422634000 | -0.374650000 |
| 6         | -0.433899 | 1.113368  | -0.298773 | 6         | 0.967099000  | -1.378957000 | -0.427185000 |
| 6         | 0.643408  | 0.218607  | -0.639147 | 6         | 1.417994000  | -0.033310000 | -0.077086000 |
| 6         | 1.997958  | 0.493524  | -0.542489 | 6         | 0.409116000  | 0.959396000  | 0.217089000  |
| 14        | -3.266953 | -0.881804 | 0.340722  | 14        | 2.731058000  | -1.355285000 | -0.467708000 |
| 14        | -1.682343 | 2.270089  | 0.049062  | 14        | 2.074768000  | 1.653611000  | 0.424175000  |
| 14        | 0.082061  | -1.647681 | -0.665944 | 14        | -1.166977000 | 0.940291000  | -1.017887000 |
| 14        | 1.710072  | -0.717218 | 0.906966  | 14        | -3.097058000 | 0.009028000  | 0.068845000  |
| 14        | 3.605107  | 0.452379  | 0.055739  | 14        | -1.083605000 | 0.111488000  | 1.359402000  |
| 1e (49.3) |           |           |           | 1f (70.4) |              |              |              |
| 6         | -0.023753 | 2.293833  | -0.051549 | 6         | -1.412255    | -0.733084    | -0.726868    |
| 6         | -1.151259 | 1.788827  | -0.071050 | 6         | -0.454884    | -1.476048    | -0.136277    |
| 6         | -2.062410 | 0.770674  | -0.045134 | 6         | 0.977627     | -1.288421    | -0.185797    |
| 6         | -1.478794 | -0.516620 | 0.006690  | 6         | 1.455835     | 0.027824     | -0.092259    |
| 6         | -0.158657 | -0.917647 | 0.014556  | 6         | 0.726436     | 1.223528     | 0.101103     |
| 14        | -3.325149 | -0.495162 | 0.035096  | 14        | 2.703435     | -1.489556    | -0.255267    |
| 14        | 1.693201  | 1.719849  | 0.076979  | 14        | 2.387877     | 1.766227     | 0.028407     |
| 14        | 1.241935  | -0.224728 | -1.314895 | 14        | -1.139800    | 1.304281     | 0.312246     |
| 14        | 1.225417  | -0.313767 | 1.327553  | 14        | -2.893140    | 0.227102     | -0.934353    |
| 14        | 1.253826  | -2.151506 | -0.061953 | 14        | -1.612412    | -0.845397    | 1.294722     |
| 1g (83.9) |           |           |           | 1h (67.4) |              |              |              |
| 6         | 0.415682  | -1.557472 | 0.000000  | 6         | -2.512954    | 2.328639     | -16.039202   |
| 6         | -0.964323 | -1.176426 | 0.000000  | 6         | -1.738997    | 2.826377     | -14.940195   |
| 6         | -1.099592 | 0.290191  | 0.000000  | 6         | -1.859955    | 2.294211     | -13.613445   |
| 6         | 1.243439  | -0.373987 | 0.000000  | 6         | -2.800037    | 1.230336     | -13.490480   |
| 6         | 0.386840  | 0.796801  | 0.000000  | 6         | -3.585605    | 0.750047     | -12.457127   |
| 14        | 2.369030  | -1.708613 | 0.000000  | 14        | -1.657642    | 3.625277     | -16.798812   |
| 14        | -0.982817 | -2.917819 | 0.000000  | 14        | -0.594036    | 3.519677     | -13.574223   |
| 14        | -0.799851 | 1.275734  | 1.589916  | 14        | -3.433150    | 0.919118     | -15.301748   |
| 14        | 0.276225  | 2.740087  | 0.000000  | 14        | -4.903786    | 1.803290     | -13.546797   |
| 14        | -0.799851 | 1.275734  | -1.589916 | 14        | -5.040549    | 0.153954     | -11.753648   |

| 2a (32.4) |           |           |          | 2b (35.1) |           |           |           |
|-----------|-----------|-----------|----------|-----------|-----------|-----------|-----------|
| 6         | -2.124452 | 0.872470  | 0.000000 | 6         | 2.414875  | 1.207734  | -0.015072 |
| 6         | 0.907593  | 3.027848  | 0.000000 | 6         | 3.563381  | 0.453278  | -0.038873 |
| 6         | -0.535474 | 2.863109  | 0.000000 | 6         | 3.467190  | -0.966876 | -0.029878 |
| 6         | -0.840075 | 1.478228  | 0.000000 | 6         | 2.206363  | -1.540285 | 0.002028  |
| 6         | -2.439516 | -0.464943 | 0.000000 | 6         | 1.019387  | -0.779098 | 0.020506  |
| 6         | 1.440101  | 1.670587  | 0.000000 | 6         | 1.101932  | 0.637957  | 0.011531  |
| 6         | 0.368829  | 0.736613  | 0.000000 | 6         | -0.122397 | 1.362946  | 0.021193  |
| 6         | 0.500727  | -0.717857 | 0.000000 | 6         | -1.316152 | 0.535874  | 0.032999  |
| 14        | 2.814460  | 2.742546  | 0.000000 | 14        | 3.930111  | 2.240076  | -0.010338 |
| 14        | -0.203401 | 4.579901  | 0.000000 | 14        | 3.574188  | -2.773670 | 0.019865  |
| 14        | -3.929621 | 0.587255  | 0.000000 | 14        | -0.761562 | -1.252512 | 0.041985  |
| 14        | -1.090963 | -1.672899 | 0.000000 | 14        | -0.803610 | 3.002077  | 0.065124  |
| 14        | -0.656438 | -3.894299 | 0.000000 | 14        | -3.052814 | 1.547616  | -0.061632 |
| 14        | 2.417465  | -1.298988 | 0.000000 | 14        | -2.643886 | -0.385300 | -1.323235 |



|           |           |           |           |           |           |           |            |
|-----------|-----------|-----------|-----------|-----------|-----------|-----------|------------|
| 14        | 0.907593  | -2.550198 | 1.252226  | 14        | -2.756627 | -2.423509 | 0.025813   |
| 14        | 0.907593  | -2.550198 | -1.252226 | 14        | -2.772048 | -0.345433 | 1.240518   |
| 2c (51.7) |           |           |           | 2d (44.5) |           |           |            |
| 6         | 3.267955  | -0.578372 | -0.027656 | 6         | 1.059966  | 5.616077  | -16.750028 |
| 6         | 2.015443  | -1.293990 | -0.253948 | 6         | 0.934669  | 4.752703  | -15.629901 |
| 6         | 0.971031  | -0.338363 | -0.270854 | 6         | 0.847928  | 5.438357  | -14.392703 |
| 6         | 1.512717  | 0.947143  | -0.065830 | 6         | 0.793028  | 6.876150  | -14.283131 |
| 6         | 2.923212  | 0.831887  | 0.084782  | 6         | 0.902157  | 7.724081  | -15.436480 |
| 6         | -0.448952 | -0.368435 | -0.491794 | 6         | 1.056162  | 7.001753  | -16.662491 |
| 6         | 0.650024  | 2.074853  | -0.032803 | 6         | 0.908288  | 3.350797  | -15.480712 |
| 14        | 3.290740  | -2.486020 | -0.234512 | 14        | 0.857977  | 2.831610  | -13.573231 |
| 14        | 4.654295  | 0.706473  | 0.277857  | 6         | 0.832765  | 4.668358  | -13.177425 |
| 14        | -1.157848 | 1.345568  | -0.488974 | 14        | 0.863366  | 1.639128  | -15.673971 |
| 14        | -0.152914 | 3.560772  | 0.084053  | 14        | 1.296087  | 6.420527  | -18.384053 |
| 6         | -1.438334 | -1.360978 | -0.571061 | 14        | 0.869323  | 9.518244  | -14.799714 |
| 14        | -3.454976 | 1.174552  | 0.059865  | 14        | 2.613814  | 8.105017  | -14.194484 |
| 14        | -3.278090 | -1.056907 | -0.704090 | 14        | 0.853356  | 7.660327  | -12.575647 |
| 14        | -2.053119 | -2.786980 | 0.457930  | 14        | 2.661586  | 5.761262  | -13.177068 |
| 14        | -1.901474 | -0.420757 | 1.250140  | 14        | 0.875056  | 5.473570  | -11.468126 |
| 2e (43.1) |           |           |           | 2f (39.2) |           |           |            |
| 6         | -2.102937 | 0.833810  | 0.000000  | 6         | 0.883305  | 5.624049  | -16.804226 |
| 6         | 0.921392  | 2.998722  | 0.000000  | 6         | 0.811657  | 4.765822  | -15.667199 |
| 6         | -0.519705 | 2.830291  | 0.000000  | 6         | 0.753210  | 5.443301  | -14.426853 |
| 6         | -0.817080 | 1.443862  | 0.000000  | 6         | 0.773665  | 6.858054  | -14.341050 |
| 6         | -2.448686 | -0.495863 | 0.000000  | 6         | 1.029084  | 7.701053  | -15.451808 |
| 6         | 1.464242  | 1.645402  | 0.000000  | 6         | 1.015915  | 7.005341  | -16.711839 |
| 6         | 0.396259  | 0.712786  | 0.000000  | 6         | 0.955738  | 3.366236  | -15.507210 |
| 6         | 0.522916  | -0.741725 | 0.000000  | 14        | 1.225527  | 2.888319  | -13.628555 |
| 14        | 2.825958  | 2.736764  | 0.000000  | 6         | 0.924823  | 4.717418  | -13.212175 |
| 14        | -0.193843 | 4.549621  | 0.000000  | 14        | 1.068337  | 1.666126  | -15.725037 |
| 14        | -3.913416 | 0.591479  | 0.000000  | 14        | 0.982535  | 6.425646  | -18.443207 |
| 14        | -1.094955 | -1.711480 | 0.000000  | 14        | 1.121463  | 9.471436  | -14.536077 |
| 14        | -0.277247 | -3.898343 | 0.000000  | 14        | 2.755732  | 7.721969  | -14.327503 |
| 14        | 2.313417  | -1.547727 | 0.000000  | 14        | 0.760080  | 7.749365  | -12.697558 |
| 14        | 0.682694  | -2.267338 | 1.546162  | 14        | 2.565688  | 5.804718  | -12.726072 |
| 14        | 0.682694  | -2.267338 | -1.546162 | 14        | 0.598766  | 5.629109  | -11.452796 |
| 2g (34.9) |           |           |           | 2h (36.7) |           |           |            |
| 6         | 2.280073  | 1.060213  | 0.149592  | 6         | -0.257041 | 2.653411  | -9.305461  |
| 6         | 3.410117  | 0.293670  | -0.033780 | 6         | -0.052526 | 3.874922  | -8.519433  |
| 6         | 3.280853  | -1.122413 | -0.078521 | 6         | -0.014293 | 3.503667  | -7.158029  |
| 6         | 2.020210  | -1.678177 | 0.070637  | 6         | -0.148946 | 2.097071  | -7.046705  |
| 6         | 0.854131  | -0.905657 | 0.268439  | 6         | -0.316304 | 1.557254  | -8.351979  |
| 6         | 0.977331  | 0.509116  | 0.315348  | 6         | 0.128602  | 4.213378  | -5.912766  |
| 6         | -0.225245 | 1.288368  | 0.514426  | 6         | -0.033896 | 1.527485  | -5.756839  |
| 6         | -1.375241 | 0.455895  | 0.670050  | 14        | -0.105903 | 4.337790  | -10.204109 |
| 14        | 3.807703  | 2.068022  | -0.041956 | 14        | -0.514622 | 0.866299  | -9.946535  |
| 14        | 3.336713  | -2.933555 | -0.179561 | 14        | 0.226450  | 2.943328  | -4.474406  |
| 14        | -0.935585 | -1.365321 | 0.470498  | 14        | 0.301443  | 0.571552  | -4.341542  |
| 14        | -0.458585 | 3.135669  | 0.196523  | 6         | 0.159102  | 5.586377  | -5.599111  |
| 14        | -1.915658 | 1.626997  | -0.913844 | 14        | -0.631985 | 4.330515  | -2.573002  |
| 14        | -2.257555 | -0.656368 | -1.443370 | 14        | -0.158521 | 6.316480  | -3.779705  |
| 14        | -3.165719 | -2.121818 | 0.259080  | 14        | 0.453993  | 7.334102  | -5.798330  |
| 14        | -3.220840 | 0.288796  | 0.848549  | 14        | -1.566704 | 4.649502  | -4.785000  |

|           |           |           |           |           |           |           |           |
|-----------|-----------|-----------|-----------|-----------|-----------|-----------|-----------|
| 3a (37.8) |           |           |           | 3b (43.7) |           |           |           |
| 6         | -0.254944 | 0.101129  | -0.000569 | 6         | -3.389416 | -0.370136 | -0.031620 |
| 6         | -1.610292 | -0.296088 | -0.000514 | 6         | -2.529435 | 0.722238  | 0.002661  |
| 6         | -2.204797 | -1.590101 | -0.000632 | 6         | -1.072392 | 0.468756  | 0.060222  |
| 6         | 0.125358  | 1.436388  | -0.000371 | 6         | -0.517738 | -0.811808 | 0.090786  |
| 6         | -0.924157 | 2.389822  | -0.000276 | 6         | -1.397680 | -1.906936 | 0.049891  |
| 6         | -2.265160 | 2.036162  | -0.000217 | 6         | -2.804510 | -1.672149 | -0.004532 |
| 6         | -2.644883 | 0.681005  | -0.000346 | 6         | -2.676095 | 2.120385  | -0.023644 |
| 6         | -3.900123 | 0.009003  | 0.000035  | 6         | -1.372795 | 2.696456  | 0.010493  |
| 6         | -3.649542 | -1.423355 | -0.000777 | 6         | -0.366802 | 1.701803  | 0.062346  |
| 14        | -5.460447 | -0.769786 | 0.001824  | 14        | -2.728718 | 3.927948  | -0.064381 |
| 14        | -2.899877 | -3.191331 | -0.000861 | 14        | -4.724402 | -1.551822 | -0.049294 |
| 14        | -2.020445 | 3.849598  | 0.000013  | 14        | -2.156121 | -3.504608 | 0.015673  |
| 14        | 2.026160  | 1.857742  | -0.000156 | 14        | 1.467735  | 1.985183  | 0.043402  |

|           |           |           |            |           |           |           |            |
|-----------|-----------|-----------|------------|-----------|-----------|-----------|------------|
| 14        | 1.404918  | -0.718678 | -0.000634  | 14        | 1.336813  | -0.783162 | 0.136350   |
| 14        | 3.114959  | -2.192886 | 0.000733   | 14        | 2.958853  | 0.336153  | 1.367839   |
| 14        | 4.941563  | -0.587494 | 0.000590   | 14        | 2.820729  | 0.360834  | -1.280116  |
| 14        | 3.159671  | 0.159740  | 1.311926   | 14        | 4.726165  | -0.068389 | -0.129930  |
| 14        | 3.160481  | 0.159732  | -1.311770  | 14        | 3.210458  | -1.965827 | -0.132373  |
| 3c (48.5) |           |           |            | 3d (50.2) |           |           |            |
| 6         | 2.360225  | 1.994565  | -0.069589  | 6         | 2.120550  | 2.130526  | 0.001928   |
| 6         | 2.421635  | 0.588110  | -0.018962  | 6         | 2.311339  | 0.733761  | -0.015377  |
| 6         | 1.160386  | -0.055775 | 0.017043   | 6         | 1.128087  | -0.023184 | -0.028322  |
| 6         | -0.061775 | 0.654960  | 0.008671   | 6         | -0.158514 | 0.555770  | 0.009252   |
| 6         | -0.120447 | 2.049560  | -0.047802  | 6         | -0.370145 | 1.941315  | -0.036259  |
| 6         | 1.155649  | 2.693392  | -0.086729  | 6         | 0.845950  | 2.688268  | -0.036375  |
| 14        | 3.827703  | -0.643249 | 0.005112   | 14        | 3.794558  | -0.366409 | 0.144591   |
| 6         | 2.428144  | -2.039614 | 0.045960   | 6         | 2.535524  | -1.931097 | -0.115282  |
| 6         | 1.153457  | -1.473329 | 0.048908   | 6         | 1.248860  | -1.451503 | -0.025779  |
| 14        | 3.868149  | -3.004952 | 0.051587   | 14        | 4.074078  | -2.666085 | -0.376750  |
| 14        | 2.598683  | 3.806267  | -0.137479  | 14        | 2.155349  | 3.958771  | 0.018628   |
| 14        | -1.699935 | 3.020220  | -0.087585  | 14        | -2.074179 | 2.758992  | -0.087105  |
| 14        | -2.867105 | 0.770329  | 0.077156   | 14        | -2.968739 | 0.499031  | 0.062143   |
| 14        | -0.549586 | -2.119755 | 0.063016   | 14        | -0.402861 | -2.333991 | 0.106568   |
| 6         | -1.274872 | -0.166507 | 0.044554   | 6         | -1.279722 | -0.360587 | 0.086377   |
| 14        | -2.329312 | -1.330616 | 1.361091   | 14        | -2.151137 | -1.489892 | 1.431733   |
| 14        | -4.336924 | -1.068754 | 0.043309   | 14        | -4.182984 | -1.595176 | 0.158859   |
| 14        | -2.330178 | -1.306194 | -1.267305  | 14        | -2.234344 | -1.584807 | -1.175882  |
| 3e (44.4) |           |           |            | 3f (31.4) |           |           |            |
| 6         | -2.958885 | 5.404511  | -18.704779 | 6         | -2.690615 | 5.477147  | -18.622463 |
| 6         | -2.781016 | 4.639809  | -17.543931 | 6         | -2.620176 | 4.852205  | -17.324763 |
| 6         | -2.521039 | 5.306856  | -16.298028 | 6         | -2.560141 | 5.589724  | -16.129668 |
| 6         | -2.434106 | 6.718261  | -16.190857 | 6         | -2.608511 | 6.995751  | -16.210183 |
| 6         | -2.612918 | 7.484937  | -17.350402 | 6         | -2.691944 | 7.621758  | -17.439720 |
| 6         | -2.866045 | 6.828919  | -18.589675 | 6         | -2.703980 | 6.920269  | -18.681164 |
| 6         | -2.799972 | 3.237850  | -17.269197 | 6         | -2.575544 | 3.462900  | -17.029918 |
| 6         | -2.556103 | 3.053892  | -15.892765 | 6         | -2.470880 | 3.358919  | -15.606253 |
| 6         | -2.376398 | 4.320611  | -15.265431 | 6         | -2.475274 | 4.679959  | -14.995162 |
| 14        | -2.798587 | 1.507164  | -16.796734 | 14        | -2.711695 | 1.775646  | -17.595197 |
| 14        | -3.186248 | 5.994324  | -20.356329 | 14        | -2.691639 | 8.816523  | -16.074182 |
| 14        | -2.777617 | 8.760780  | -18.570605 | 14        | -4.440017 | 6.020457  | -19.757378 |
| 14        | -2.071683 | 4.760508  | -13.555788 | 14        | -2.810137 | 4.504442  | -20.228583 |
| 14        | -2.140633 | 7.210643  | -14.464524 | 14        | -2.836632 | 7.626851  | -20.415627 |
| 14        | -0.485181 | 6.494305  | -12.803835 | 14        | -2.440970 | 1.546635  | -14.877966 |
| 14        | -3.205593 | 6.612267  | -12.371722 | 14        | -2.392621 | 5.001578  | -13.057105 |
| 14        | -1.573615 | 7.343592  | -10.881231 | 14        | -3.683813 | 3.200092  | -13.805478 |
| 14        | -1.778096 | 8.693008  | -12.833592 | 14        | -1.089757 | 3.231045  | -13.911662 |
| 3g (27.3) |           |           |            | 3h (31.9) |           |           |            |
| 6         | -0.114996 | 0.325998  | 0.292494   | 6         | -2.634350 | 5.482785  | -18.634635 |
| 6         | 1.216254  | -0.150162 | 0.141086   | 6         | -2.552246 | 4.845966  | -17.337886 |
| 6         | 1.692023  | -1.488530 | 0.056717   | 6         | -2.578251 | 5.591627  | -16.127646 |
| 6         | -0.356336 | 1.707370  | 0.336372   | 6         | -2.663856 | 6.997969  | -16.208120 |
| 6         | 0.760949  | 2.566921  | 0.228431   | 6         | -2.756996 | 7.620899  | -17.435436 |
| 6         | 2.067642  | 2.112803  | 0.120077   | 6         | -2.729543 | 6.922124  | -18.685370 |
| 6         | 2.329081  | 0.730826  | 0.066043   | 6         | -2.444880 | 3.475146  | -17.043080 |
| 6         | 3.513948  | -0.046090 | -0.063644  | 6         | -2.375809 | 3.369689  | -15.611693 |
| 6         | 3.139738  | -1.452301 | -0.075971  | 6         | -2.502312 | 4.705278  | -15.007707 |
| 14        | 4.989437  | -0.962790 | -0.231410  | 14        | -2.633442 | 1.696679  | -17.254683 |
| 14        | 2.218345  | -3.147048 | -0.057400  | 14        | -2.815395 | 8.814022  | -16.070195 |
| 14        | 1.963202  | 3.935607  | 0.112570   | 14        | -4.439731 | 6.013605  | -19.771256 |
| 14        | -2.185505 | 2.212539  | 0.202197   | 14        | -2.700216 | 4.572904  | -20.272700 |
| 14        | -1.583635 | -0.788252 | 0.776111   | 14        | -2.914881 | 7.683873  | -20.392507 |
| 14        | -3.425256 | -1.338571 | -0.881541  | 14        | -2.694571 | 1.479635  | -14.860321 |
| 14        | -2.108309 | -2.986522 | 0.137199   | 14        | -2.189453 | 4.905219  | -13.052153 |
| 14        | -2.219409 | 0.517794  | -1.463900  | 14        | -3.757165 | 3.436489  | -13.921928 |
| 14        | -3.544920 | 0.426614  | 0.900932   | 14        | -1.111251 | 3.067992  | -14.075157 |
